# Supplementary material for: Liquid exfoliation of layered metal sulphide for enhanced photocatalytic activity of TiO2 nanoclusters and DFT study
Source: Royal Society of Chemistry journal article supplement (doi:10.1039/c6ra03534e), 2016-01-01
Supplement: c6ra03534e1.pdf [file c6ra03534e1.pdf]

### ***LDFT computational method***

Calculation of the as-prepared composite photocatalysts were carried out by using Gaussian 09 program (see ***Supporting Information***) at the density functional B3LYP level using the LANL2DZ basis set for both geometry optimization and frequency calculation. After initial calculation the separated TiO<sub>2</sub> and LMS moieties, the structures of promising TiO<sub>2</sub>-LMS combinations were also calculated using the B3LYP density functional with the LANL2DZ basis set. The minimum energy was calculated by using DFT-D3 method to obtain the optimum binding site.

### Capture tests of hydroxyl radical ( $\cdot\text{OH}$ )

The formation of hydroxyl radical ( $\cdot\text{OH}$ ) of as-prepared materials was detected by a photoluminescence method using terephthalic acid (TA) as a probe molecule. Fifty milligrams of as-prepared sample was dispersed in the aqueous solution (250 mL) containing twenty milligrams TA and twenty milligrams NaOH. Xenon long-arc lamp irradiation was used as visible-light source. Four milliliter of reaction solution was collected every 15 min for analysis, and then the filtered sample was used for PL measurement at an F-4500 fluorescence spectrophotometer with the excitation wavelength of 321 nm. The scan speed was  $240\text{ nm}\cdot\text{min}^{-1}$ , PMT voltage was 700 V, and the width of excitation and emission slit were set to be both 5 nm.

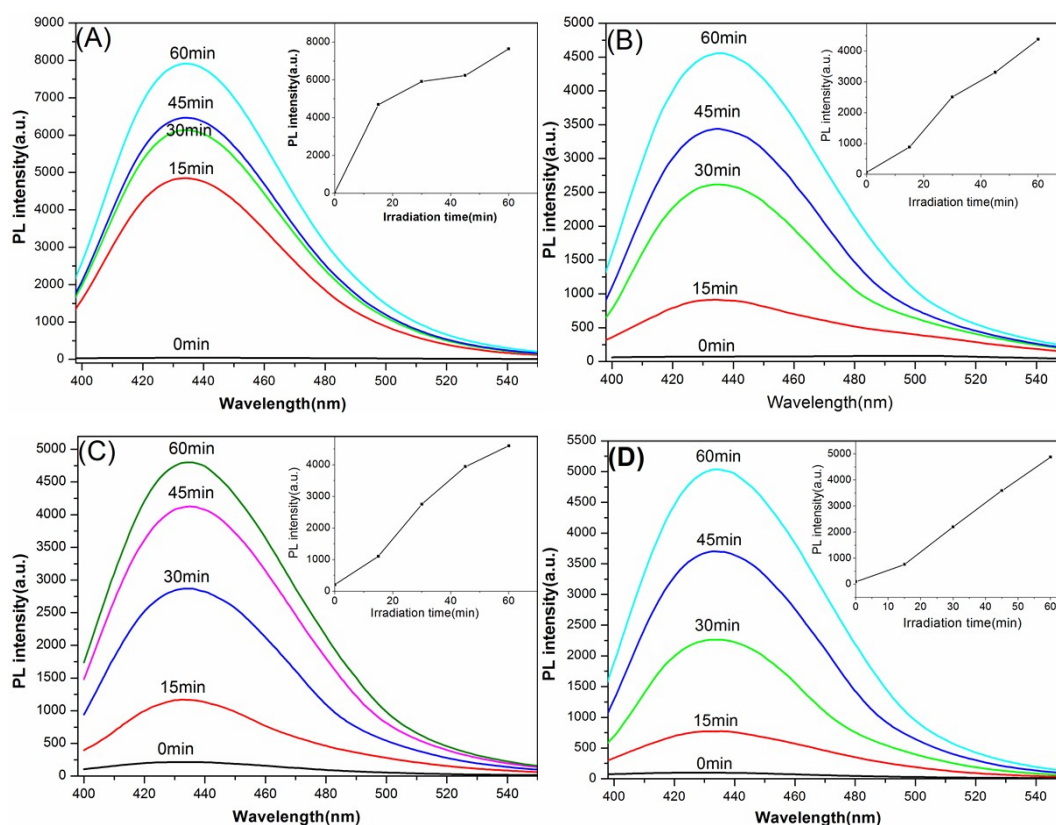

**Figure S1.** PL spectra change of terephthalic acid in different time for  $\cdot\text{OH}$  captured experiment of P25 (A) and  $\text{TiO}_2/\text{MoS}_2$  (B),  $\text{TiO}_2/\text{WS}_2$  (C) and  $\text{TiO}_2/\text{SnS}_2$  (D). The insert images are the PL intensity changing with time.

The photoluminescence technique was served to examine the formation of hydroxyl radicals ( $\cdot\text{OH}$ ) on the  $\text{TiO}_2/\text{LMS}$  surface. Hydroxyl radicals were analyzed by the conversion of terephthalic acid to 2-hydroxy terephthalic acid, which can be used as a hydroxyl radical molecular sensing probes for hydroxyl radical detection in photocatalytic reaction. Figure S1 shows the PL spectrum changes during visible light irradiation of P25,  $\text{TiO}_2/\text{MoS}_2$ ,  $\text{TiO}_2/\text{WS}_2$  and  $\text{SnS}_2$ , respectively. The fluorescence intensities at about 426 nm exhibit a gradually increasing tendency against the irradiation time, which is caused by chemical reactions between terephthalic acid

and  $\cdot\text{OH}$ . The insert plots of  $\text{TiO}_2/\text{LMS}$  show that these PL intensities increase almost linearly against the irradiation time as compared P25, suggesting that  $\text{TiO}_2/\text{MoS}_2$ ,  $\text{TiO}_2/\text{WS}_2$  and  $\text{TiO}_2/\text{SnS}_2$  composites possessed better photostability. Further, the PL intensity of P25 in unit time was higher than that of  $\text{TiO}_2/\text{LMS}$ , indicating the production rate of  $\cdot\text{OH}$  on P25 faster than that on  $\text{TiO}_2/\text{LMS}$ . However, the results of photocatalytic experiment showed that the photocatalytic activity was far less than that of  $\text{TiO}_2/\text{LMS}$ , which speculated that  $\cdot\text{OH}$  was not the main active species in the photocatalytic process.
